# Supplementary material for: Magnetically recyclable core–shell MOF nanoparticles of Fe3O4@PDA@UIO-66-NH2 grafted by organic acids for intensified cationic dye adsorption
Source: Royal Society of Chemistry journal article supplement (doi:10.1039/d2nj01748b), 2022-01-01
Supplement: d2nj01748b1.pdf [file d2nj01748b1.pdf]

## Supporting Information

Magnetically recyclable core-shell MOF nanoparticles of  $\text{Fe}_3\text{O}_4@\text{PDA}@$   
UIO-66- $\text{NH}_2$  grafted by organic acids for the intensified cationic dyes adsorption

Yujia Fu,<sup>†a</sup> Yue Xu,<sup>†a</sup> Boxuan Lou,<sup>a</sup> Xiaolan Qin,<sup>a</sup> Leilei Zhang,<sup>a</sup> Haikuan Yuan,<sup>a</sup> Lijuan Zhang,<sup>\*a</sup> Yan Zhang,<sup>b</sup>  
Jie Lu,<sup>\*a</sup>

<sup>a</sup> Chemical Engineering Department, Institute for Frontier Medical Technologies, Shanghai University of  
Engineering Science, Shanghai 201620, China

<sup>b</sup> Process Engineering Department, Memorial University of Newfoundland, St John's NL, A1B 3X5, Canada

\* Corresponding author: Tel./fax: +86 21 67791216. E-mail address: zhanglj0128@126.com(L. Zhang),  
LuJie@sues.edu.cn (J. Lu).

<sup>†</sup> These authors made equal contributions.

E-mail: 1967609783@qq.com (Y. Fu); xuyue9326@163.com (Y. Xu);  
louboxuanlxb@163.com (B. Lou); 940389768@qq.com (X. Qin);  
zll953@sina.com (L. Zhang); yhk12345@163.com (H. Yuan);  
zhanglj0128@126.com (L. Zhang); yanz@mun.ca (Y. Zhang);  
lujie@sues.edu.cn (J. Lu).

## **Table of Contents**

Text 1-3

Table S1-S4

Fig. S1-S2

References

### **Text S1. Chemicals**

Anhydrous sodium acetate (NaAc), tris (hydroxymethyl) aminomethane (TRIS), ethylene glycol, methylene blue trihydrate, rhodamine B (RhB) ferric chloride hexahydrate ( $\text{FeCl}_3 \cdot 6\text{H}_2\text{O}$ ), dopamine hydrochloride (DAH), 2-aminoterephthalic acid ( $\text{H}_2\text{BDC-NH}_2$ ), EDC $\cdot\text{HCl}$ , DMF, zirconium tetrachloride ( $\text{ZrCl}_4$ ), 4-morpholineethane-sulfonic acid (MES), N-hydroxysuccinimide (NHS), tartaric acid (tar), citric acid (citr), methanol and anhydrous ethanol were purchased from Titan company (Songjiang, China). DI water for the solution preparation and material wash was supplied from a PureUP device from Ulupure company (Baoshan, China).

### **Text S2. General characterization**

Field emission SEM images of the prepared adsorbents were acquired from a Leo1550 microscope (Carl Zeiss, Jena, Germany). A FTIR spectrometer (Perkin-Elmer, Norwalk, CT) was utilized for the analysis of the functional groups of adsorbents. Powder X-ray diffractograms of in-house constructed adsorbents were harvested using an X'Pert diffractometer supplied by Panalytical (Almelo, The Netherlands). The curves of magnetization saturation for modified materials at 298 K were obtained using a 7404 magnetometer (Lakeshore, Westerville, CA).  $\text{N}_2$  adsorption-desorption experiments for pore volume ( $V_p$ ) and specific surface area ( $S_a$ ) were determined on an Autosorb iQ machine (Quantachrome Instruments, Boynton Beach, FL) at 77 K. The pH-dependent surface zeta potentials were evaluated by a ZS nanosizer (Malvern, UK). XPS spectra were measured by a Thermo Scientific K-Alpha XPS system (Thermo Fisher Scientific, MA, USA).

### **Text S3. Reusability test of the two adsorbents**

In a typical desorption process, the MB-loaded mUIO-66-NH-tar and mUIO-66- NH-citr nanoparticles were immersed respectively into a mixture of ethanol and 0.01 M HCl solution (V/V=4:1) at 298K for 1 h. The adsorbents were then transferred into ethanol and 0.01 M NaOH solution (V/V=4:1) for 1 h under constant shaking. The adsorbents were harvested through magnets and washed with about 200-300 mL DI water several times for the next adsorption.

**Table S1**

Deprotonation of the adsorbents under basic solution conditions.

|                                                 | mUIO-66-NH-tar |        | mUIO-66-NH-citr |        |
|-------------------------------------------------|----------------|--------|-----------------|--------|
| Initial pH of aqueous solutions                 | 9.03           | 11.00  | 9.03            | 11.00  |
| Volume of solution (mL)                         | 400            | 20     | 400             | 20     |
| Solution pH after PE <sup>a</sup>               | 8.43           | 10.73  | 8.10            | 10.66  |
| Mass of adsorbents (mg)                         | 5              | 5      | 5               | 5      |
| Deprotonation capacity (10 <sup>-2</sup> meq/g) | 64.19          | 185.19 | 75.65           | 217.16 |

<sup>a</sup> PE represents the phase equilibrium achieved after immersing adsorbents into aqueous solutions

**Table S2**

The element surface composition from XPS wide survey spectra.

|                    | Surface composition (at.%) |      |       |      |
|--------------------|----------------------------|------|-------|------|
|                    | C                          | N    | O     | S    |
| mUIO-66-NH-tar     | 63.69                      | 6.95 | 29.36 | -    |
| mUIO-66-NH-tar-MB  | 68.62                      | 9.07 | 19.76 | 2.56 |
| mUIO-66-NH-citr    | 63.39                      | 6.68 | 29.93 | -    |
| mUIO-66-NH-citr-MB | 64.22                      | 9.05 | 24.08 | 2.65 |

**Table S3**

Deconvolution results of XPS spectra of the two adsorbents adsorbed before and after MB.

| Region | mUIO-66-NH<br>-tar |       | mUIO-66-NH<br>-tar-MB |       | mUIO-66-NH<br>-citr |       | mUIO-66-NH<br>-citr-MB |       | Assignment                            |
|--------|--------------------|-------|-----------------------|-------|---------------------|-------|------------------------|-------|---------------------------------------|
|        | B.E.               | %     | B.E.                  | %     | B.E.                | %     | B.E.                   | %     |                                       |
| N      | 398.86             | 24.49 | -                     | -     | 398.89              | 42.19 | -                      | -     | -NH <sub>2</sub>                      |
|        | 399.43             | 51.02 | 399.68                | 64.52 | 399.80              | 31.65 | 399.78                 | 64.51 | -N-C=O                                |
|        | 400.88             | 24.49 | 400.89                | 18.06 | 401.28              | 26.16 | 400.70                 | 24.52 | C-N                                   |
|        | -                  | -     | 401.97                | 17.42 | -                   | -     | 402.09                 | 10.97 | N <sup>+</sup> of quaternary ammonium |
| O      | 529.91             | 13.61 | 529.68                | 25.31 | 529.91              | 16.52 | 529.28                 | 15.46 | Fe-O                                  |
|        | 531.17             | 31.49 | 530.71                | 38.69 | 531.17              | 46.08 | 530.89                 | 55.24 | -COO <sup>-</sup>                     |
|        | 532.47             | 54.91 | 531.81                | 35.99 | 532.27              | 37.40 | 531.84                 | 29.30 | O=C O-H                               |

**Table S4**

Comparison with various adsorbents for ionic dyes.

| Adsorbent                                                          | Dye type / Adsorbate       | Equilibrium time (min) | $Q_m$ (mg/g) | Refs      |
|--------------------------------------------------------------------|----------------------------|------------------------|--------------|-----------|
| Fe <sub>3</sub> O <sub>4</sub> @UIO-66                             | Anionic / Acid blue 92     | 5                      | 129.9        | 1         |
| Fe <sub>3</sub> O <sub>4</sub> @UIO-66@PPI                         | Anionic / Direct red 31    | 5                      | 173.3        | 1         |
| Fe <sub>3</sub> O <sub>4</sub> @UIO-66                             | Cationic / MB              | 180                    | 205.0        | 2         |
| UIO-66                                                             | Cationic / MB              | 90                     | 543.5        | 3         |
| Amino-MIL-101                                                      | Cationic / MB              | 210                    | 762.0        | 4         |
| Fe <sub>3</sub> O <sub>4</sub> @Cu <sub>3</sub> (BTC) <sub>2</sub> | Cationic / MB              | 4                      | 113.7        | 5         |
| Fe <sub>3</sub> O <sub>4</sub> /MIL-101                            | Anionic / Methylene orange | 15                     | 80.0         | 6         |
| MgFe <sub>2</sub> O <sub>4</sub> @MOF                              | Cationic / Rhodamine       | 3                      | 219.8        | 7         |
| Fe <sub>3</sub> O <sub>4</sub> /MIL-88A                            | Anionic / Bromophenol blue | 60                     | 76.0         | 8         |
| mUIO-66-NH-tar                                                     | Cationic / MB              | 50                     | 381.7        | This work |
| mUIO-66-NH-citr                                                    | Cationic / MB              | 50                     | 432.9        | This work |

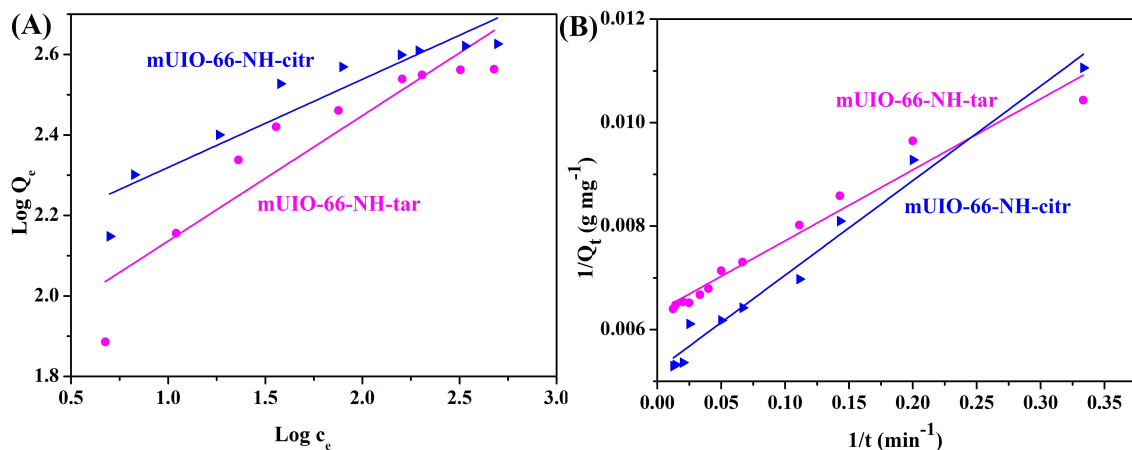

**Fig. S1** Adsorption isotherms fitted by by Freundlich model (A) and kinetic curves fitted by PFO equation (B) for MB on two adsorbents.

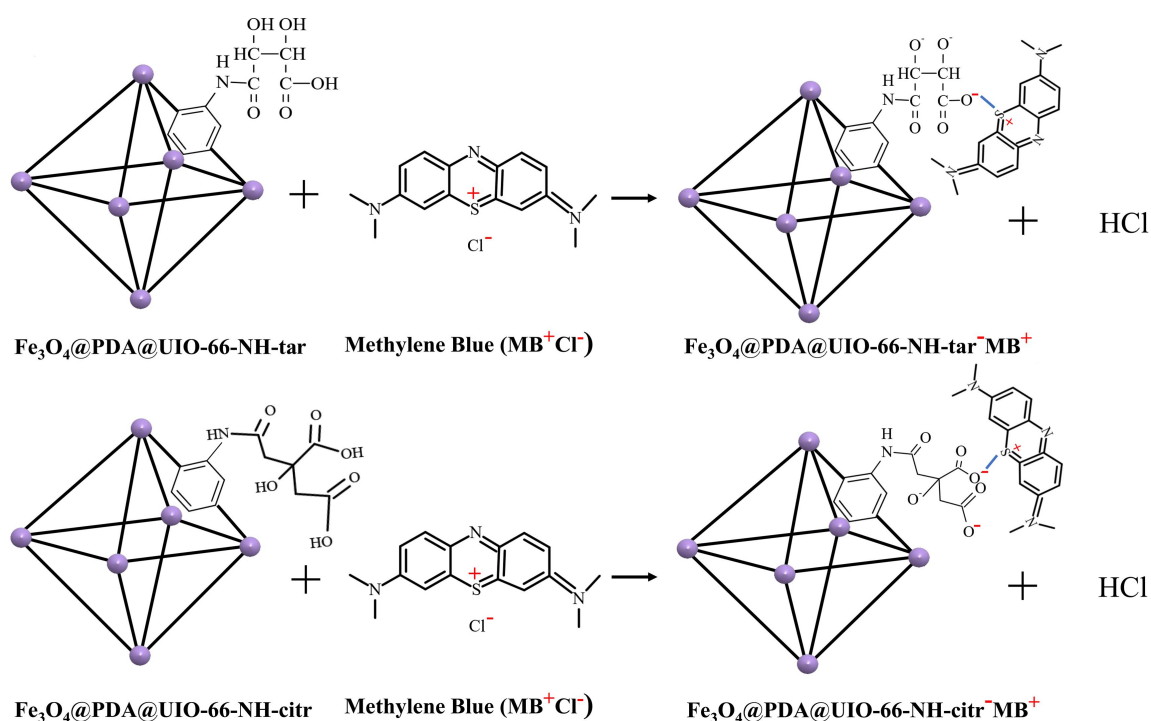

**Fig. S2** cation exchange mechanism under  $\text{pH} < \text{pH}_{\text{PZC}}$  of the adsorbents.

## References

- [1] H.S. Far, M. Hasanzadeh, M.S. Nashtaei, M. Rabbani, A. Haji, B.H. Moghadam, *ACS Appl. Mater. Interfaces*, 2020, **12** 25294-25303.

- [2] S. Ahmadipouya, M.H. Haris, F. Ahmadijokani, A. Jarahiyan, H. Molavi, F.M. Moghaddam, M. Rezakazemi, M. Arjmand, *J. Mol. Liq.*, 2021, **322**, 114910.
- [3] X. Song, P. Yang, D. Wu, P. Zhao, X. Zhao, L. Yang, Y. Zhou, *Chem. Phys.* 2020, **531**, 110655.
- [4] E. Haque, V.Lo, A.I. Minett, A.T. Harris, T.L. Church, *J. Mater. Chem. A*, 2014, **2**, 193-203.
- [5] H. Sun, H. Zhang, H. Mao, B. Yu, J. Han, G. Bhat, *Environ. Chem. Lett.*, 2018, **17**, 1091-1096.
- [6] Z. Jiang, Y. Li, *J. Taiwan Inst. Chem. Eng.*, 2016, **59** 373-379.
- [7] H. Tian, J. Peng, T. Lv, C. Sun, H. He, *J. Solid State Chem.* 2018, **257**, 40-48.
- [8] Y. Liu, Y. Huang, A. Xiao, H. Qiu, L. Liu, *Nanomaterials*, 2019, **9**, 51.
